# Supplementary material for: Preoperative Multiparametric Quantitative Magnetic Resonance Imaging Correlates with Prognosis and Recurrence Patterns in Pancreatic Ductal Adenocarcinoma
Source: MDPI journal article supplement (doi:10.3390/cancers14174243), 2022-08-31
Supplement: s1 [file s1]

**Table S1.** Cox Survival Analysis of Predictors of Recurrence-Free Survival.

| Variables                                  | Category                  | Univariate analysis |              | Multivariate analysis |              |
|--------------------------------------------|---------------------------|---------------------|--------------|-----------------------|--------------|
|                                            |                           | HR (95% CI)         | P value      | HR (95% CI)           | P value      |
| Age(years)                                 | <65vs. ≥65                | 0.746(0.498,1.119)  | 0.157        |                       |              |
| Sex                                        | Male vs. Female           | 1.072(0.718,1.599)  | 0.734        |                       |              |
| CEA(ng/ml)                                 | ≤5 vs.>5                  | 1.028(0.591,1.787)  | 0.923        |                       |              |
| CA19-9(U/ml)                               | ≤39 vs.>39                | 0.793(0.438,1.248)  | 0.258        |                       |              |
| After surgery<br>CA19-9(U/ml)              | ≤39 vs.>39                | 1.418(0.948,2.121)  | 0.089        |                       |              |
| Type of surgery                            | PD                        | Ref                 |              |                       |              |
|                                            | DP                        | 1.241(0.799,1.925)  | 0.336        |                       |              |
|                                            | TP                        | 1.953(0.931,4.094)  | 0.076        |                       |              |
| Tumor location                             | Head                      | Ref                 |              |                       |              |
|                                            | Body                      | 0.919(0.397,2.124)  | 0.842        |                       |              |
|                                            | Tail                      | 1.162(0.741,1.823)  | 0.513        |                       |              |
| Tumor size(cm)                             | ≤ 2                       | Ref                 |              | Ref                   |              |
|                                            | 2-4                       | 2.092(1.100,3.980)  | <b>0.024</b> | 1.993(1.040,3.818)    | <b>0.038</b> |
|                                            | >4                        | 3.117(1.491,6.515)  | <b>0.003</b> | 2.642(1.256,5.555)    | <b>0.010</b> |
| N stage                                    | N0                        | Ref                 |              |                       |              |
|                                            | N1                        | 1.465(0.963,2.228)  | 0.074        |                       |              |
|                                            | N2                        | 1.742(0.878,3.457)  | 0.112        |                       |              |
| AJCC stage, 8th,                           | IA                        | Ref                 |              |                       |              |
|                                            | IB                        | 2.045(0.905,4.623)  | 0.086        |                       |              |
|                                            | IIA                       | 1.849(0.584,5.855)  | 0.296        |                       |              |
|                                            | IIB                       | 2.602(1.165,5.809)  | <b>0.020</b> |                       |              |
|                                            | III                       | 3.277(1.264,8.494)  | <b>0.015</b> |                       |              |
| Baseline resectability                     | Resectable vs. Borderline | 1.156(0.741,1.803)  | 0.522        |                       |              |
| Margin                                     | R0 vs. R1                 | 1.767(1.162,2.685)  | <b>0.008</b> | 1.759(1.149,2.692)    | <b>0.009</b> |
| Nerve invasion                             | (+) vs. (-)               | 0.928(0.516,1.666)  | 0.801        |                       |              |
| Adjuvant Chemotherapy                      | Yes vs. No                | 0.761(0.507,1.143)  | 0.189        |                       |              |
| ADC (×10 <sup>-3</sup> mm <sup>2</sup> /s) | >1.33 vs. ≤1.33           | 1.621(1.086,2.420)  | <b>0.018</b> | 1.238(0.781,1.964)    | 0.364        |
| D(×10 <sup>-3</sup> mm <sup>2</sup> /s)    | >1.08 vs. ≤1.08           | 2.474(1.616,3.787)  | <b>0.001</b> | 2.066(1.252,3.409)    | <b>0.005</b> |
| D*(×10 <sup>-3</sup> mm <sup>2</sup> /s)   | >7.94 vs. ≤7.94           | 1.008(0.649,1.565)  | 0.972        |                       |              |
| f                                          | >0.28 vs. ≤0.28           | 0.598(0.399,0.895)  | <b>0.012</b> | 0.818(0.517,1.294)    | 0.391        |
| DDC                                        | >1.5 vs. ≤1.5             | 1.390(0.903,2.140)  | 0.135        |                       |              |
| α                                          | >0.86 vs. ≤0.86           | 1.441(0.872,2.382)  | 0.154        |                       |              |
