# Supplementary material for: Preoperative Multiparametric Quantitative Magnetic Resonance Imaging Correlates with Prognosis and Recurrence Patterns in Pancreatic Ductal Adenocarcinoma
Source: MDPI journal article supplement (doi:10.3390/cancers14174243), 2022-08-31
Supplement: s1 [file s1]

**Figure S1-S3 Related immunohistochemical and correlation analysis results**

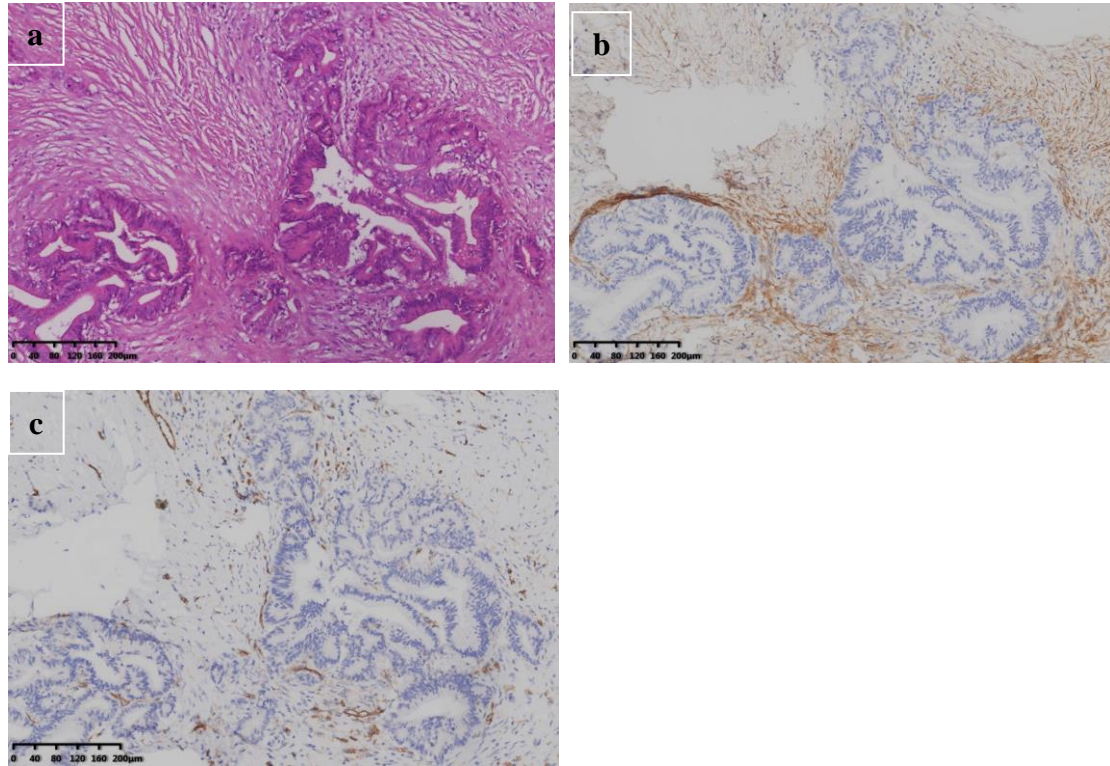

**Figure S1.** HE staining of one PDAC case (a,HE,x10). Immunohistochemical staining of anti-collagen type I showed that the collagen content is not abundant(b,collagen,x10) and fewer capillaries(c,CD31,x10)in the tumor microenvironment.

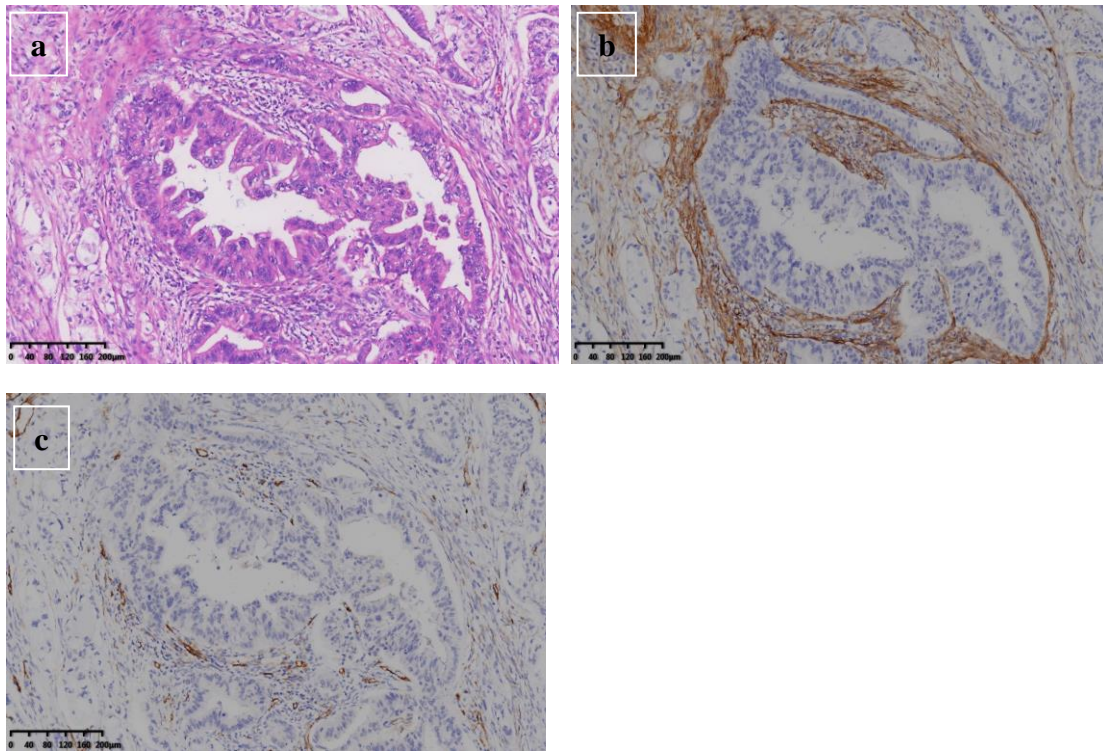

**Figure S2.** HE staining of one PDAC case. (a, HE, x10). Immunohistochemical staining showed that the collagen content was abundant (b, collagen, x10) and more capillaries (c, CD31, x10) in the tumor microenvironment.

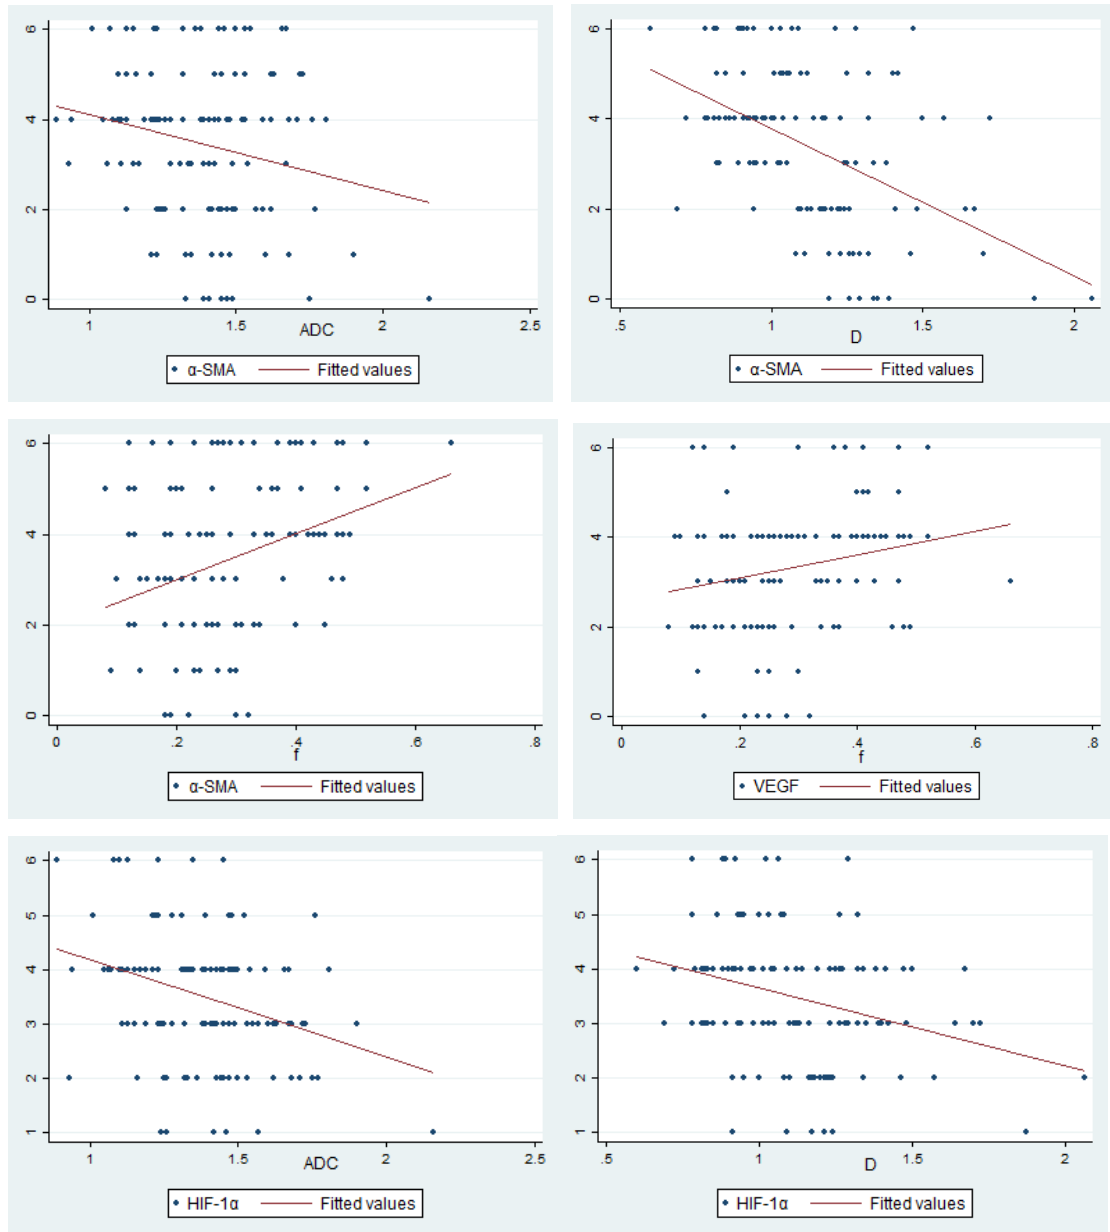

**Figure S3.** The Pearson correlation analysis between quantitative MRI parameters and the histopathology of PDAC.
